# Supplementary material
Source: PubMed Central journal article supplement (PMC5872824)
Supplement: NIHMS859676-supplement-T_1.pdf [file NIHMS859676-supplement-T_1.pdf]

| Clone     | loop       | E36G | E67A | V182 | S207G | N382D | N408S | T567A | Q598L | I648V | V708I | M235L | F284Y | S492 | N496 | other            |
|-----------|------------|------|------|------|-------|-------|-------|-------|-------|-------|-------|-------|-------|------|------|------------------|
| 4R-H-3    | LAISDQTKHA |      |      |      |       |       |       |       |       |       | x     |       |       |      |      |                  |
| 4R-H-4    | LAISDQTKHA |      |      |      |       |       | x     |       |       |       | x     |       |       |      | D    | L59P             |
| 4R-H-5    | LAKDQTKSTA |      |      |      |       |       | x     |       |       |       | x     |       |       |      |      |                  |
| 4R-H-9    | LANQDYTKTA |      |      |      |       |       |       |       |       |       |       |       |       |      | P    |                  |
| 4R-H-10   | LAISDQTKHA |      |      |      |       |       |       |       |       |       | x     |       |       |      | Y    |                  |
| 4R-H-12   | LANQDYTKTA | x    |      |      |       |       |       |       |       |       | x     |       |       |      |      |                  |
| 4R-H-15   | LAISDQTKHA |      |      |      |       |       |       |       |       |       | x     |       |       |      |      |                  |
| 4R-H-16   | LAHDITKNIA |      |      |      |       |       | x     |       |       |       | x     |       |       |      |      |                  |
| 4R-H-17   | LAHDITKNIA |      |      |      |       |       | x     |       |       |       | x     |       |       |      |      |                  |
| 4R-SD-2   | LAHDITKNIA |      | x    |      | x     |       | x     |       |       |       | x     |       |       |      |      |                  |
| 4R-SD-3   | LAHDITKNIA |      |      |      |       |       | x     |       |       |       | x     |       |       |      |      |                  |
| 4R-SD-10  | LAISDQTKHA |      |      |      |       |       | x     |       |       |       | x     |       |       |      |      |                  |
| 4R-SD-11  | LANQDYTKTA |      |      | E    |       |       |       |       |       |       | x     |       |       |      | P    |                  |
| 4R-SD-12  | LAISDQTKHA |      |      |      |       | x     |       |       |       |       | x     |       |       |      |      | Q186R,D594N      |
| 4R-SD-15  | LADQDYTKTA |      |      |      |       |       |       |       |       |       | x     | x     | x     |      |      |                  |
| 4R-SD-16  | LAISDQTKHA |      |      | E    |       |       | x     |       |       |       | x     |       |       |      |      | D69E             |
| 4R-SD-17  | LAISDQTKHA |      |      | E    |       |       |       |       |       |       | x     |       |       |      | Y    |                  |
| 4R-SD-18  | LAHDITKNIA |      |      |      |       |       | x     |       |       |       | x     |       |       |      |      |                  |
| 5R-Hind1  | LAQPDATKNA |      | x    | I    |       |       |       |       |       |       | x     |       |       |      |      |                  |
| 5R-Hind2  | LAHDITKNIA |      | x    |      | x     |       |       |       |       |       | x     |       |       |      |      | E12V,K137E       |
| 5R-Hind3  | LANQDYTKTA |      | x    |      |       |       |       |       |       |       | x     |       |       |      |      | R585G,S662C      |
| 5R-Hind6  | LADQDYTKTA |      |      |      |       | x     |       |       |       |       | x     |       |       |      |      |                  |
| 5R-Hind8  | LANQDYTKTA |      | x    |      |       |       |       |       |       |       | x     |       |       |      |      |                  |
| 5R-Hind10 | LADQDYTKTA | x    |      |      |       |       | x     |       |       |       | x     |       |       |      |      |                  |
| 5R-Hind11 | LANQDYTKTA | x    |      |      |       |       | x     |       |       |       | x     |       |       |      |      | N335K            |
| 5R-Hind12 | LAHDITKNIA |      |      |      |       |       | x     |       |       |       | x     |       |       |      |      |                  |
| 5R-Hind14 | LAISDQTKHA |      |      |      |       |       |       |       |       |       | x     |       |       |      |      | S423N            |
| 5R-Hind15 | LAISDQTKHA |      |      |      |       |       |       |       |       |       | x     |       |       |      |      | N214D            |
| 5R-Hind16 | LAHDITKNIA |      |      |      |       |       | x     |       |       |       | x     |       |       |      |      |                  |
| 5R-Hind17 | LADQDYTKTA |      | x    |      |       |       | x     |       |       |       | x     |       |       |      |      |                  |
| 5R-Hind18 | LAISDQTKHA |      |      |      |       |       |       |       |       |       | x     |       |       |      |      |                  |
| 5R-Hind19 | LAHDITKNIA |      | x    |      | x     |       | x     |       |       |       | x     |       |       |      |      | H38L,E147A       |
| 5R-Hind22 | LANQDYTKTA | x    |      |      |       |       |       |       |       |       | x     |       |       |      | P    | N227D,N587S      |
| 5R-Hind23 | LAHDITKNIA | x    | x    |      |       |       | x     |       |       |       | x     |       |       |      |      |                  |
| 5R-Ce1    | LANQDYTKTA |      | x    |      |       |       |       |       |       |       | x     |       |       |      | P    | D41G,K105E,G163D |
| 5R-Ce5    | LADQDYTKTA |      |      |      |       |       | x     |       |       |       | x     |       |       |      |      |                  |
| 5R-Ce6    | LAQPDATKNA |      | x    |      | x     |       |       |       |       |       | x     |       |       |      |      | P29A             |
| 5R-Ce8    | LAKDQTKSTA |      |      |      |       |       |       |       |       |       | x     |       |       |      |      |                  |
| 5R-Ce9    | LANQDYTKTA |      | x    |      | x     |       | x     |       |       |       | x     |       |       |      | P    |                  |

Tervo et al., Table S1
