# Supplementary material
Source: PubMed Central journal article supplement (PMC5872824)
Supplement: NIHMS859676-supplement-T_2.pdf [file NIHMS859676-supplement-T_2.pdf]

| Injection location   | Location of Projection Neurons | Labeling efficiency | Viral transgene | Mouse background   |
|----------------------|--------------------------------|---------------------|-----------------|--------------------|
| mouse mPFC (IL/PL)   | MEC                            | strong              | Cre             | ROSA26-LSL-H2B-GFP |
| mouse mPFC (IL/PL)   | LEC                            | strong              | Cre             | ROSA26-LSL-H2B-GFP |
| mouse mPFC (IL/PL)   | contra mPFC                    | strong              | Cre             | ROSA26-LSL-H2B-GFP |
| mouse mPFC (IL/PL)   | mediodorsal thalamus           | moderate            | Cre             | ROSA26-LSL-H2B-GFP |
| mouse mPFC (IL/PL)   | insular cortex                 | strong              | Cre             | ROSA26-LSL-H2B-GFP |
| mouse mPFC (IL/PL)   | hippocampus- ventral CA1       | strong              | Cre             | ROSA26-LSL-H2B-GFP |
| mouse mPFC (IL/PL)   | AcG                            | strong              | Cre             | ROSA26-LSL-H2B-GFP |
| OFC                  | MEC                            | strong              | Cre             | ROSA26-LSL-H2B-GFP |
| OFC                  | LEC                            | Strong              | Cre             | ROSA26-LSL-H2B-GFP |
| OFC                  | contra OFC                     | strong              | Cre             | ROSA26-LSL-H2B-GFP |
| OFC                  | insular cortex                 | strong              | Cre             | ROSA26-LSL-H2B-GFP |
| OFC                  | hippocampus- ventral CA1       | moderate            | Cre             | ROSA26-LSL-H2B-GFP |
| dorsal CA1           | MEC                            | strong              | Cre             | ROSA26-LSL-H2B-GFP |
| dorsal CA2           | LEC                            | strong              | Cre             | ROSA26-LSL-H2B-GFP |
| dorsal CA3           | CA3                            | weak                | Cre             | ROSA26-LSL-H2B-GFP |
| dorsal CA4           | nucleus reuniens of thalamus   | weak                | Cre             | ROSA26-LSL-H2B-GFP |
| amygdala             | mPFC                           | strong              | Cre             | ROSA26-LSL-H2B-GFP |
| lateral hypothalamus | mPFC                           | strong              | Cre             | ROSA26-LSL-H2B-GFP |
| dorsomedial striatum | mPFC                           | strong              | Cre             | ROSA26-LSL-H2B-GFP |
| NAcc                 | mPFC                           | strong              | Cre             | ROSA26-LSL-H2B-GFP |
| MEC                  | mPFC                           | moderate            | FLPo            | RCE:dual           |
| mPFC                 | ventral CA1                    | moderate            | FLPo            | RCE:dual           |
| mPFC                 | MEC                            | moderate            | FLPo            | RCE:dual           |
| subiculum            | nucleus accumbens              | moderate            | Cre             | ROSA26-LSL-H2B-GFP |
| subiculum            | ventral hippocampus            | strong              | Cre             | ROSA26-LSL-H2B-GFP |
| subiculum            | retrosplenial cortex           | strong              | Cre             | ROSA26-LSL-H2B-GFP |
| subiculum            | lateral entorhinal cortex      | strong              | Cre             | ROSA26-LSL-H2B-GFP |
| subiculum            | medial entorhinal cortex       | strong              | Cre             | ROSA26-LSL-H2B-GFP |
| superior colliculus  | layer 5 in visual cortex       | very weak           | GCaMP6s         | wt                 |
| superior colliculus  | layer 5 in visual cortex       | very weak           | Cre             | Ai94               |
| superior colliculus  | layer 5 in visual cortex       | strong              | Cre             | wt + in situ       |
| AAV2/1-FLEX-GCaMP6s  |                                |                     |                 |                    |
| dLGN                 | layer 6 in visual cortex       | very weak           | GCaMP6s         | ROSA26-LSL-H2B-GFP |
| dLGN                 | layer 6 in visual cortex       | very weak           | Cre             | Ai94               |
| dLGN                 | layer 6 in visual cortex       | strong              | Cre             | wt + in situ       |
| AAV2/1-FLEX-GCaMP6s  |                                |                     |                 |                    |

| Injection location         | Location of Projection Neurons                 | Labeling efficiency | Viral transgene | Mouse background    |
|----------------------------|------------------------------------------------|---------------------|-----------------|---------------------|
| visual cortex              | contralateral visual cortex                    | strong              | Cre             | ROSA26-LSL-H2B-GFP  |
| visual cortex              | contralateral visual cortex                    | strong              | GFP             | wt                  |
| visual cortex              | contralateral visual cortex                    | weak                | GCaMP6s         | wt                  |
| visual cortex              | contralateral visual cortex                    | strong              | tdTomato        | wt                  |
| visual cortex              | LGN                                            | strong              | tdTomato        | wt                  |
| visual cortex              | claustrum                                      | strong              | tdTomato        | wt                  |
| visual cortex              | cingulate                                      | moderate            | tdTomato        | wt                  |
| visual cortex              | LM                                             | strong              | tdTomato        | wt                  |
| dorso-lateral striatum     | M1                                             | strong              | tdTomato        | wt                  |
| dorso-lateral striatum     | M1                                             | moderate            | GFP             | wt                  |
| dorso-lateral striatum     | M2                                             | strong              | tdTomato        | wt                  |
| dorso-lateral striatum     | somatosensory cortex                           | strong              | tdTomato        | wt                  |
| dorso-lateral striatum     | basolateral amygdala                           | strong              | tdTomato        | wt                  |
| dorso-lateral striatum     | insular cortex                                 | strong              | tdTomato        | wt                  |
| dorso-lateral striatum     | entorhinal cortex                              | strong              | tdTomato        | wt                  |
| dorso-lateral striatum     | Globus Pallidus                                | moderate            | tdTomato        | wt                  |
| dorso-lateral striatum     | thalamus                                       | moderate            | tdTomato        | wt                  |
| dorso-lateral striatum     | intralaminar thalamic nuclei                   | strong              | GFP             | wt                  |
| dorso-lateral striatum     | raphe nucleus                                  | very weak           | tdTomato        | wt                  |
| dorso-lateral striatum     | VTA                                            | very weak           | tdTomato        | wt                  |
| basolateral amygdala       | taste cortex                                   | strong              | flex-tdTomato   | Vglut-Cre           |
| forelimb motor cortex      | motor thalamus                                 | weak                | GFP             | wt                  |
| nucleus tractus solitarius | lateral amygdala                               | moderate            | tdTomato        | wt                  |
| spinal cord                | cortex                                         | strong              | flex-tdTomato   | Rbp4-Cre            |
| spinal cord                | cortex                                         | strong              | GFP             | wt                  |
| spinal cord, lamina IX     | spinal cord:<br>presynaptic inhibitory neurons | strong              | flex-tdTomato   | GAD2-Cre            |
| muscle                     | spinal motor neurons                           | moderate            | Cre             | ROSA26-LSL-tdTomato |
| muscle                     | proprioceptor neurons                          | moderate            | Cre             | ROSA26-LSL-tdTomato |

Tervo et al., Table S2
